# Supplementary material
Source: PubMed Central journal article supplement (PMC1618482)

**Scanning Electron Micrographs of Butterfly Wing Scales.**

Ridge-lamellae Structure.

*Callicore aegina*:

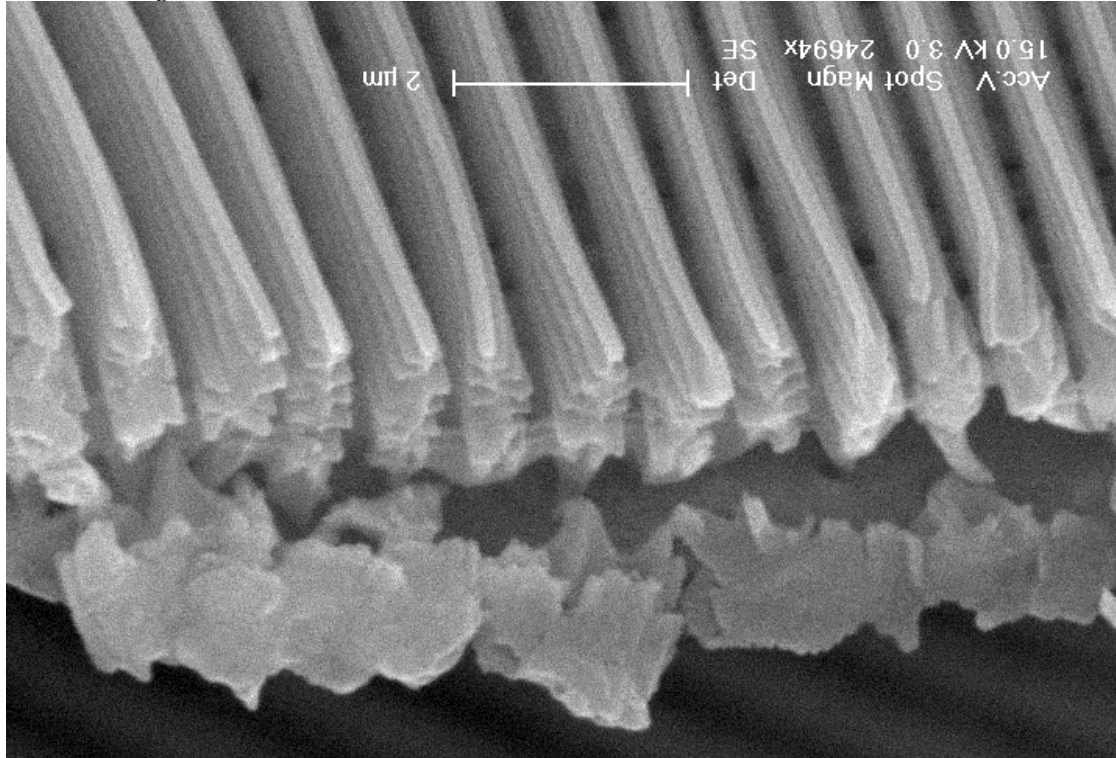

*Morpho didius*:

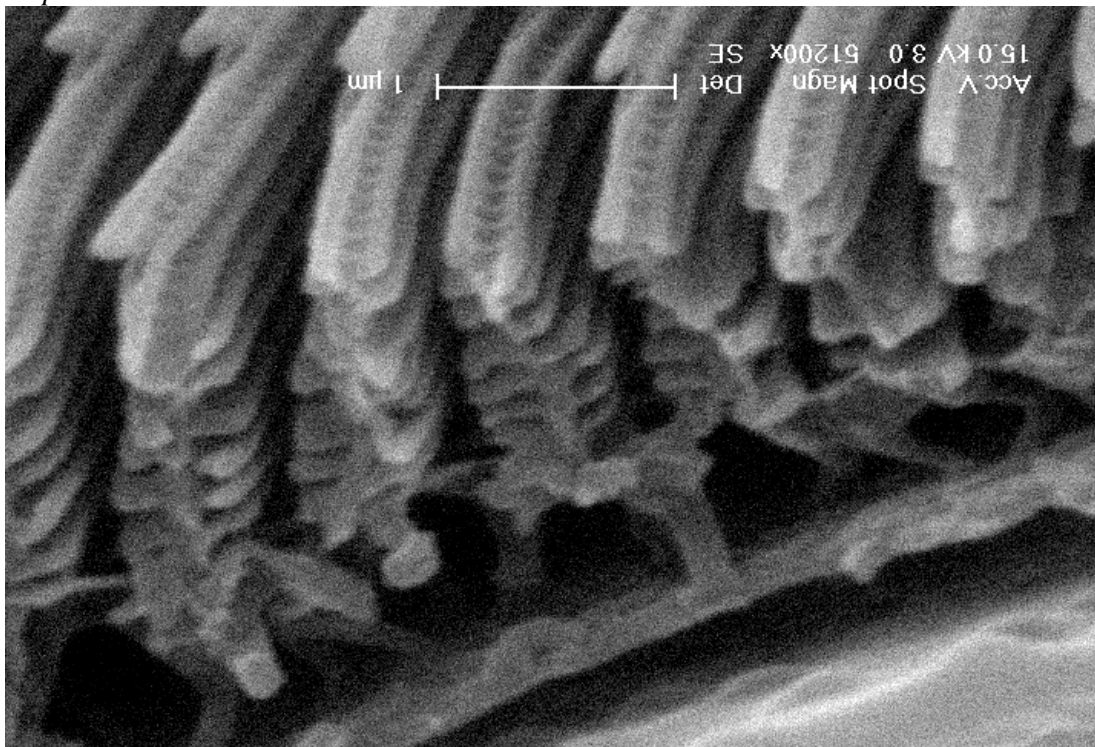

*Perisama humboldtii*:

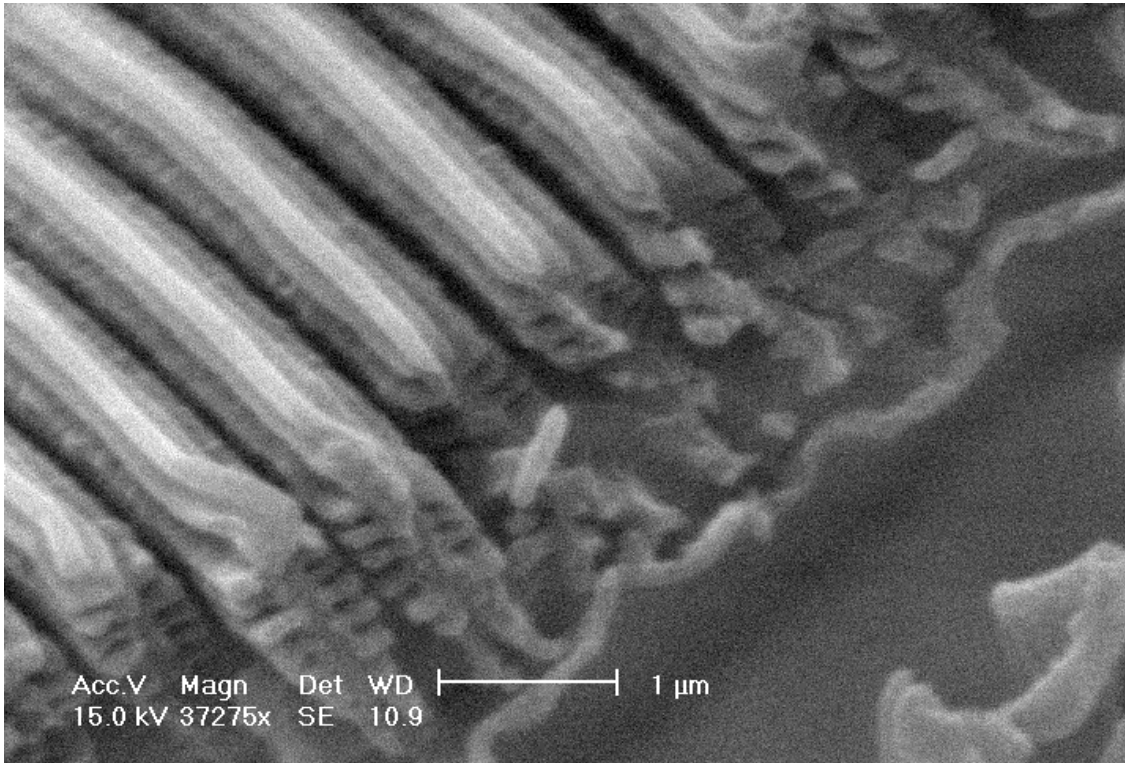

*Trogonoptera brookiana*:

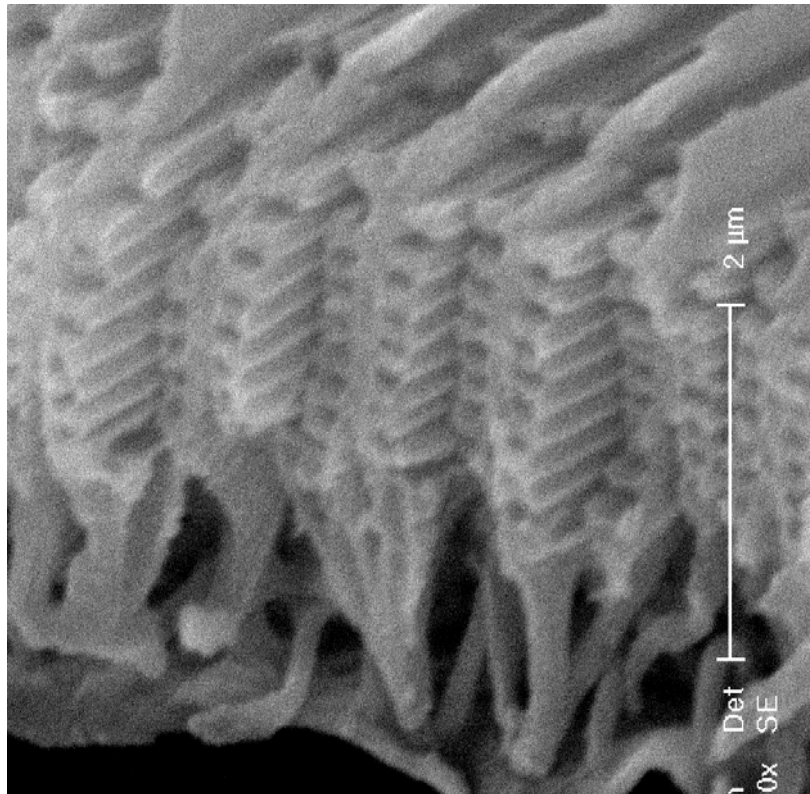

Microrib Structure.

*Caligo martia*:

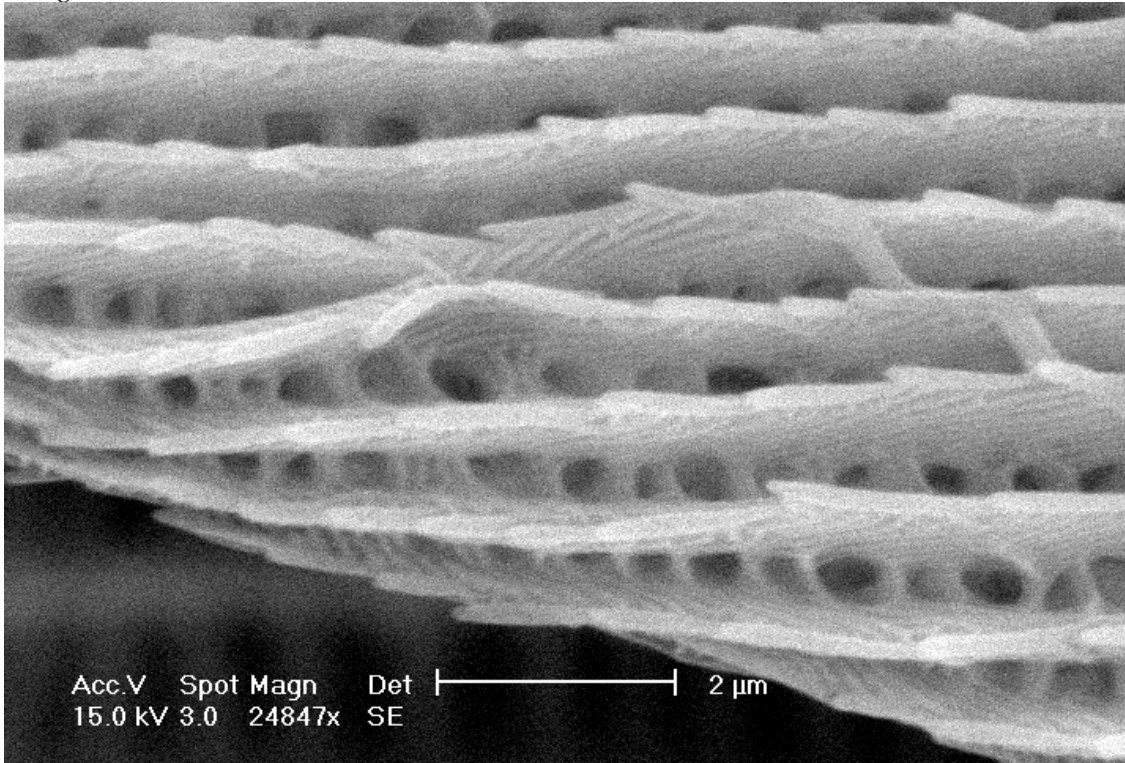

*Eryphanis aesacus*:

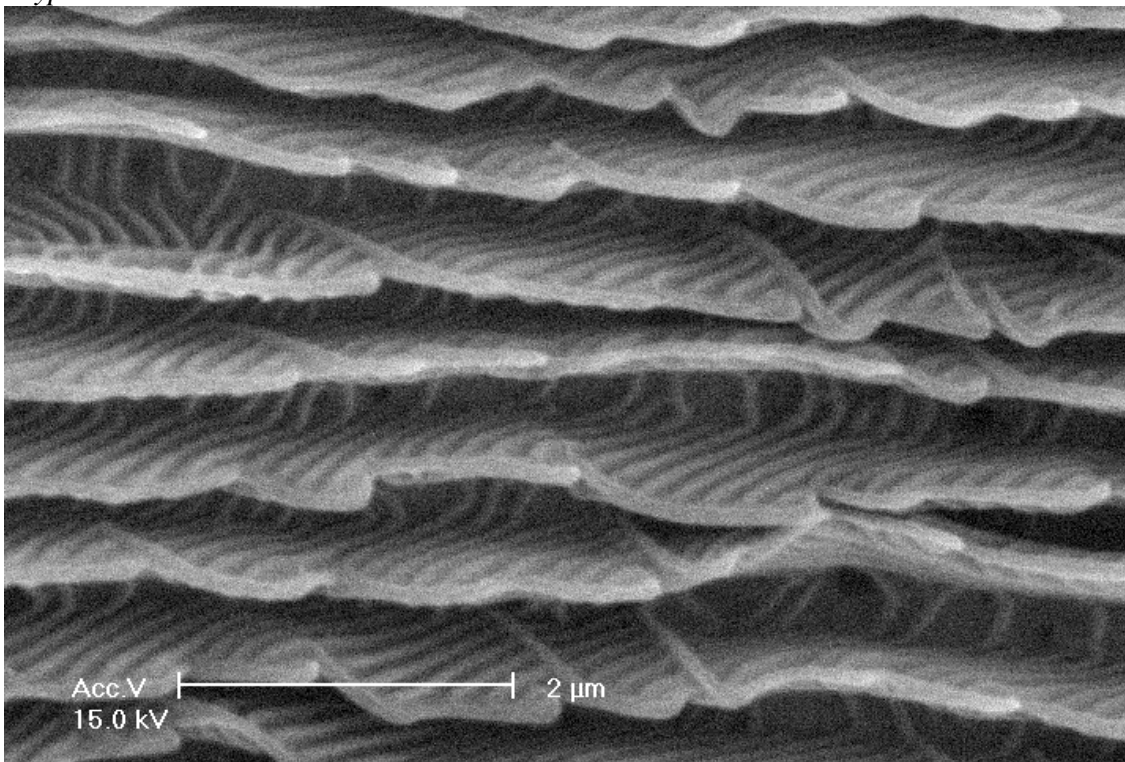

Tilted Multi-layer Structure.

*Diaethria neglecta*:

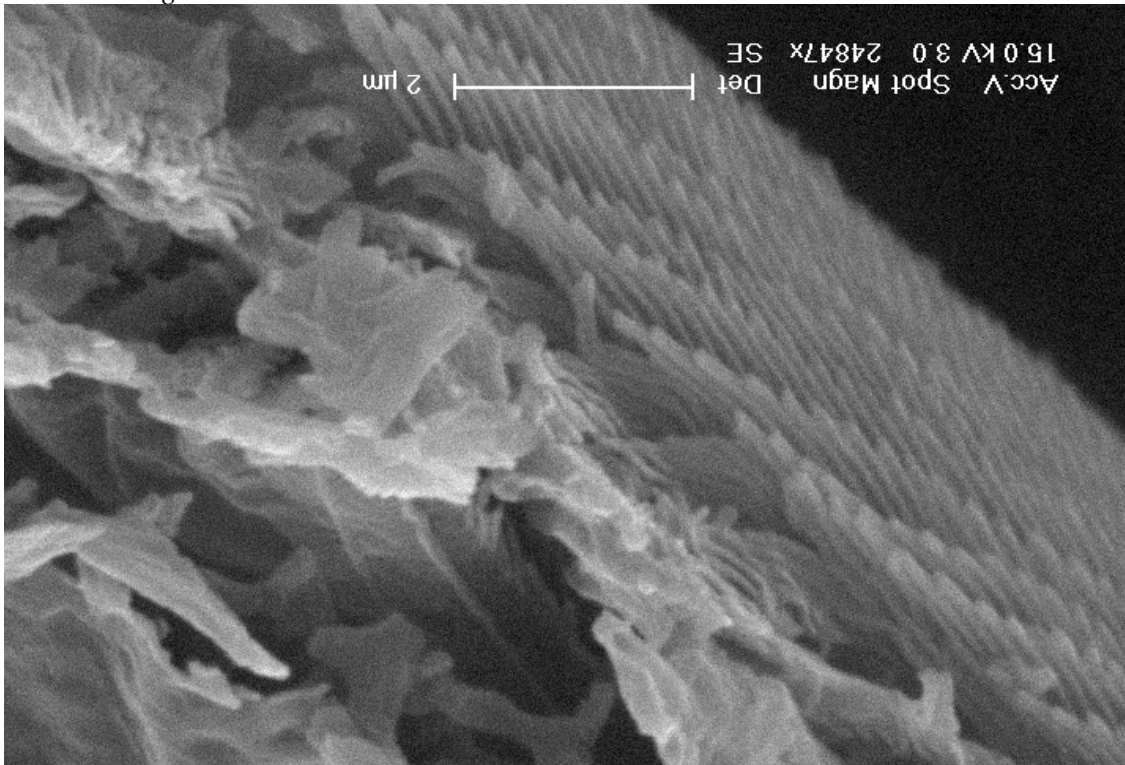

*Euploea midamus*:

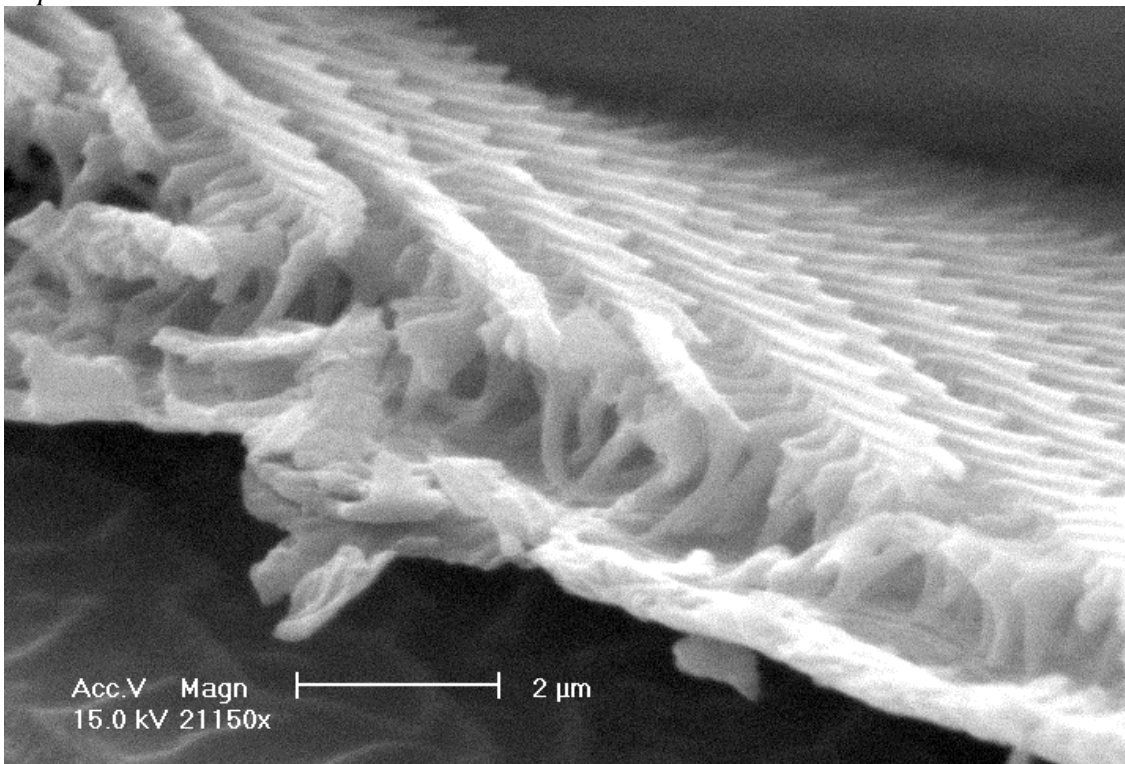



*Paulogramma peristera*:

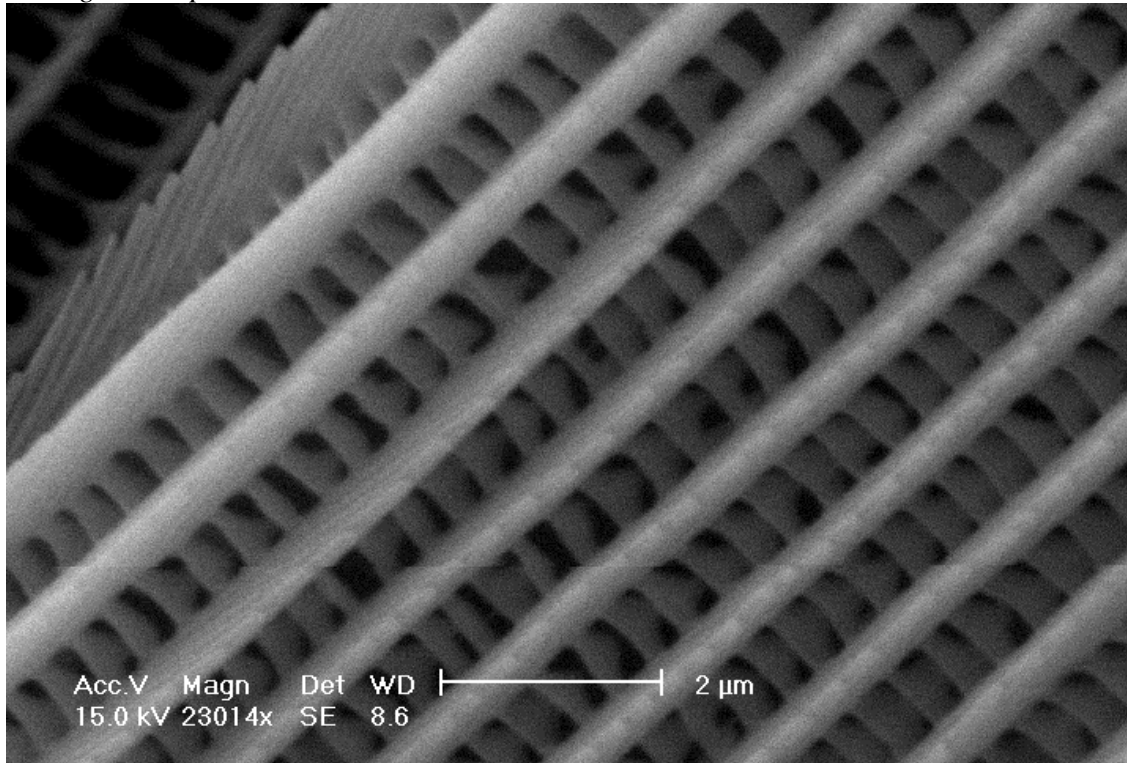

*Troides magellanus*:

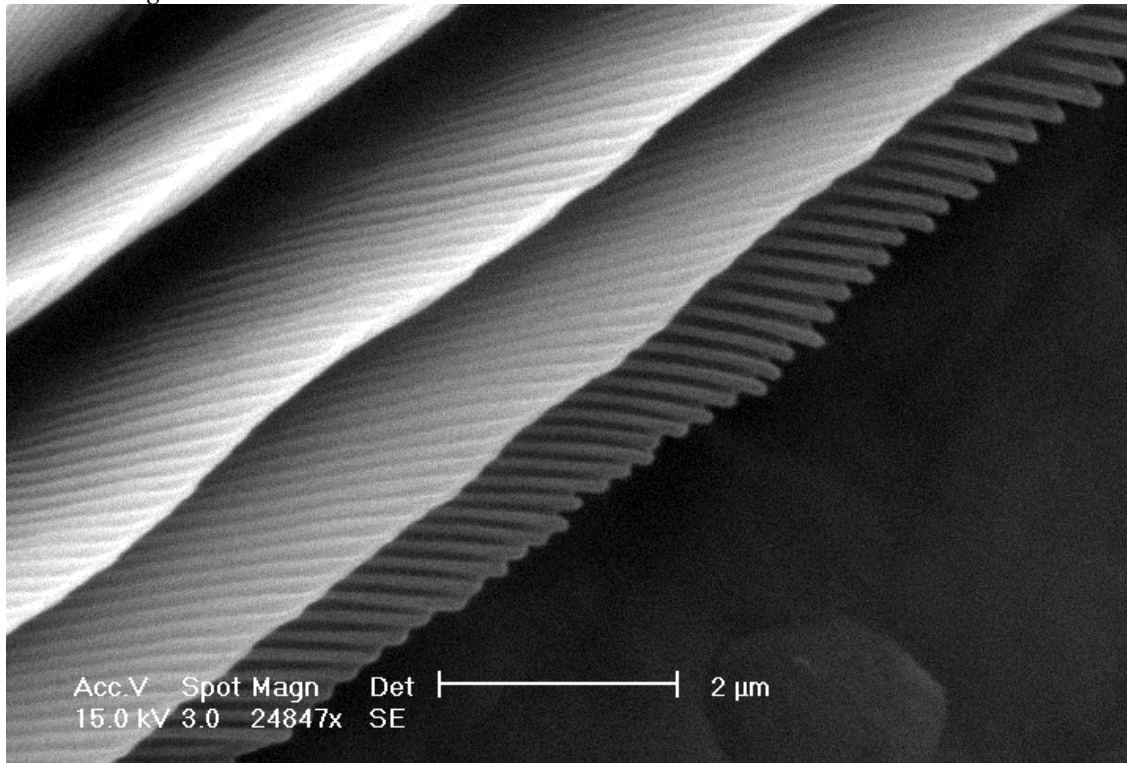

Supplement: rsif20050071s02.pdf [file rsif20050071s02.pdf]
